# Supplementary material for: Food-Web Models Predict Species Abundances in Response to Habitat Change
Source: PLOS journal article supplement (doi:10.1371/journal.pbio.0040324), 2006-09-20
Supplement: S8 (10.1371/journal.pbio.0040324.s008) [file journal.pbio.0040324.s008]

Table S8. Path structure for top-down + limited volume model. Symbols and abbreviations as in Table S3.

|  | Vol | Prey | Proto | Fletch | Wyeo | Metrio | Habro | Sarra |
| --- | --- | --- | --- | --- | --- | --- | --- | --- |
| Vol | s(Vol) | 0 | 0 | 0 | 0 | 0 | 0 | 0 |
| Prey | 0 | s(Prey) | + | + | 0 | + | 0 | 0 |
| Proto | 0 | 0 | s(Proto) | 0 | + | 0 | 0 | + |
| Fletch | + | 0 | 0 | s(Fletch) | 0 | 0 | 0 | 0 |
| Wyeo | + | 0 | 0 | + | s(Wyeo) | 0 | 0 | 0 |
| Metrio | 0 | 0 | 0 | 0 | 0 | s(Metrio) | 0 | 0 |
| Habro | 0 | 0 | 0 | + | + | 0 | s(Habro) | 0 |
| Sarra | 0 | 0 | 0 | 0 | 0 | 0 | 0 | s(Sarra) |
